# Supplementary material for: Low-temperature densification of Al-doped Li7La3Zr2O12: a reliable and controllable synthesis of fast-ion conducting garnets
Source: Royal Society of Chemistry journal article supplement (doi:10.1039/c6ta06961d), 2016-11-21
Supplement: c6ta06961d1.pdf [file c6ta06961d1.pdf]

## Supporting Information

### Low-temperature densification of Al-doped $\text{Li}_7\text{La}_3\text{Zr}_2\text{O}_{12}$ : A reliable and controllable synthesis of fast-ion conducting garnets

Hany El-Shinawi, Gary W. Paterson, Donald MacLaren, Edmund J. Cussen and Serena A. Corr

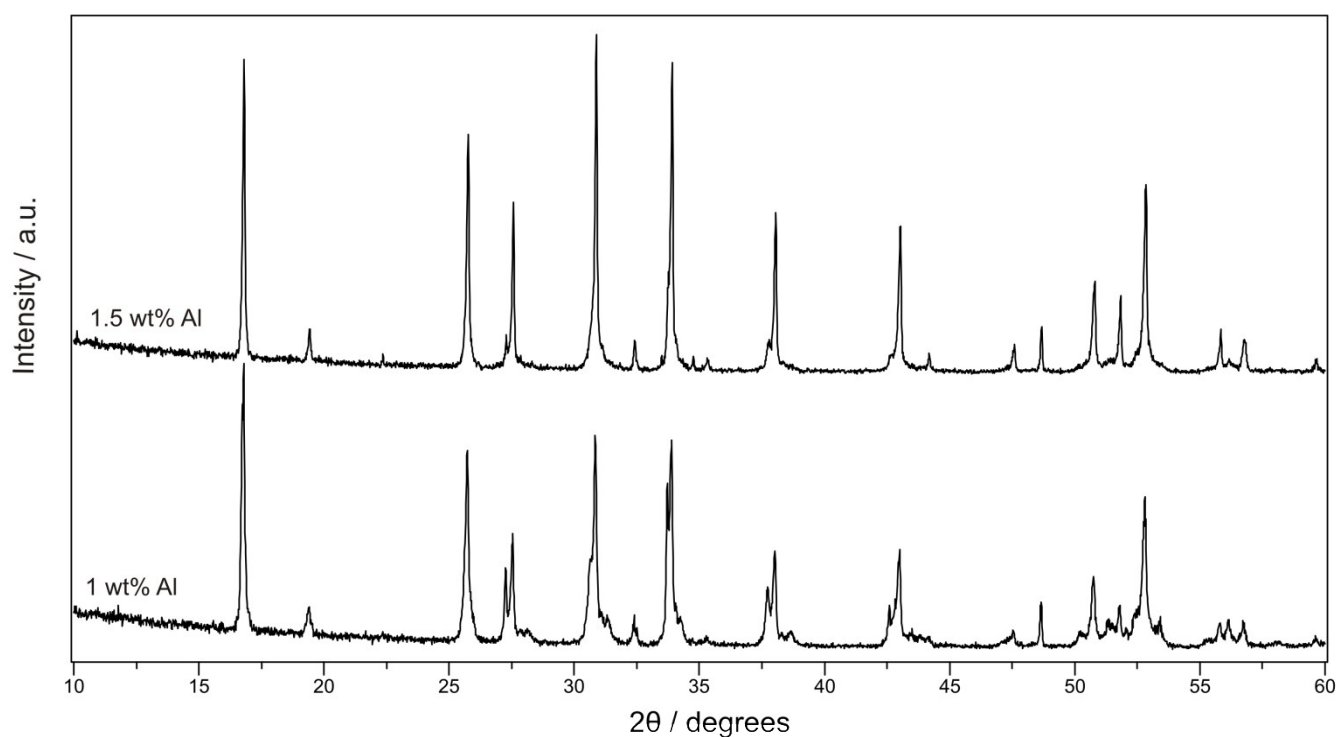

**Figure S1.** XRD patterns for LLZO phases containing 1.0 and 1.5 wt% Al. These phases contain stoichiometric amounts of Zr (*i.e.* no excess of Zr). The impurity phases  $\text{LiAlO}_2$  and  $\text{Li}_2\text{ZrO}_3$  are not seen, but LLZO exhibits peak broadening/splitting.

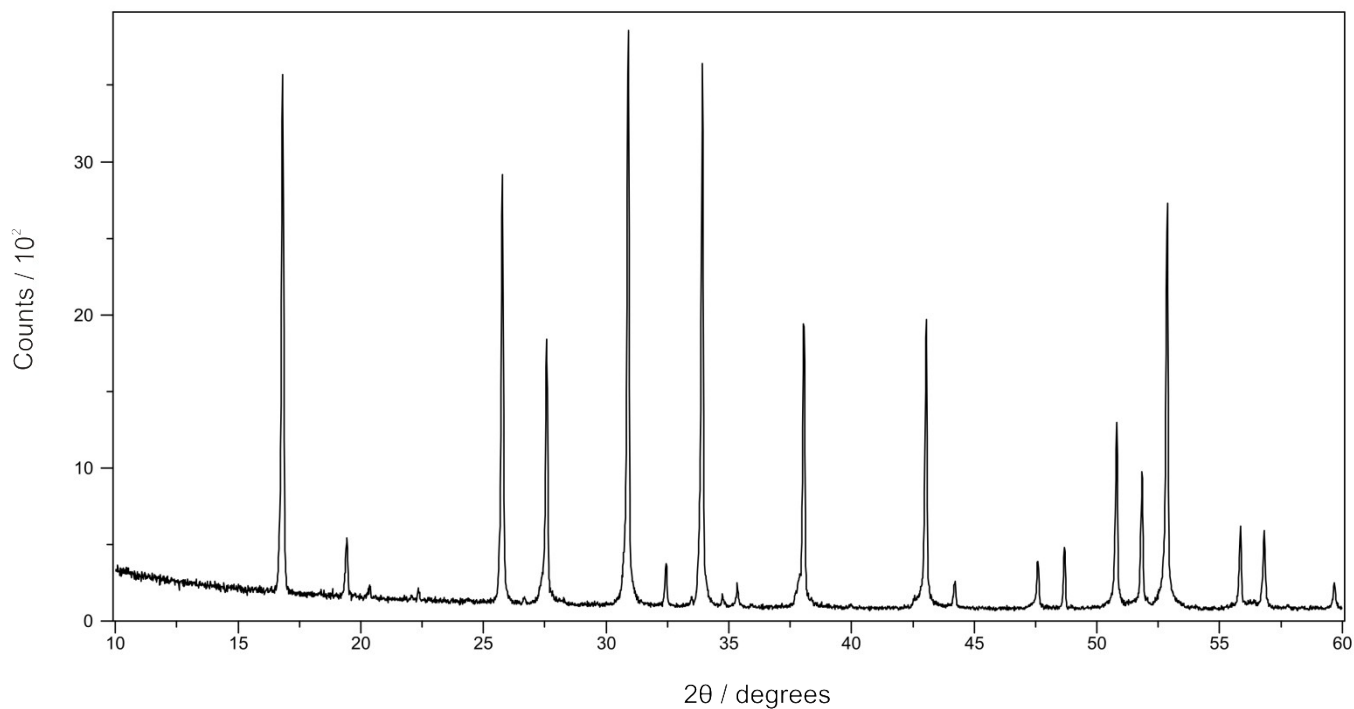

**Figure S2.** XRD pattern for LLZO containing excess of Zr and doped with 1.5 wt % Al. The impurity phases  $\text{LiAlO}_2$  and  $\text{Li}_2\text{ZrO}_3$  are seen, and the LLZO diffraction peaks exhibit some broadening.

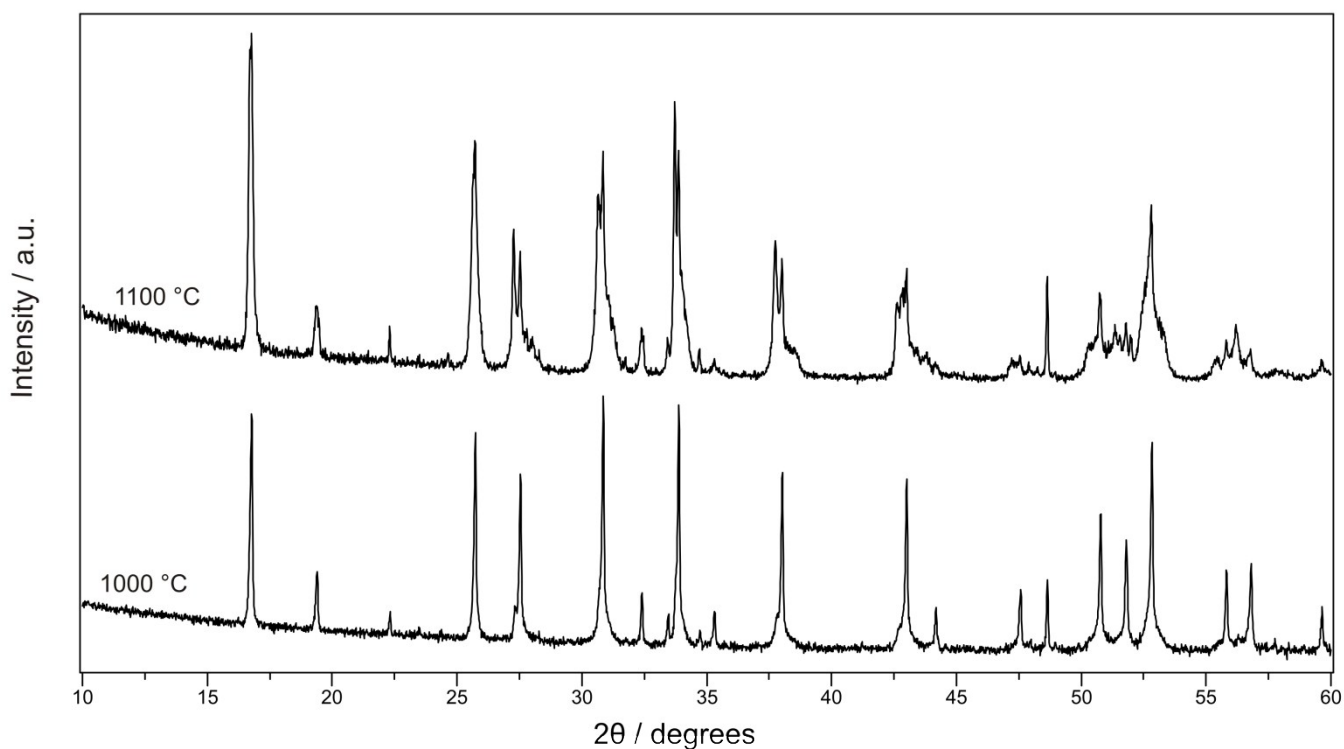

**Figure S3.** XRD patterns for LLZO phases containing stoichiometric amounts of Zr (*i.e.* no excess of Zr) and doped with 2 wt% Al. The impurity phase  $\text{Li}_2\text{ZrO}_3$  is not observed, but LLZO exhibits peak broadening/splitting, particularly at higher calcination temperature.

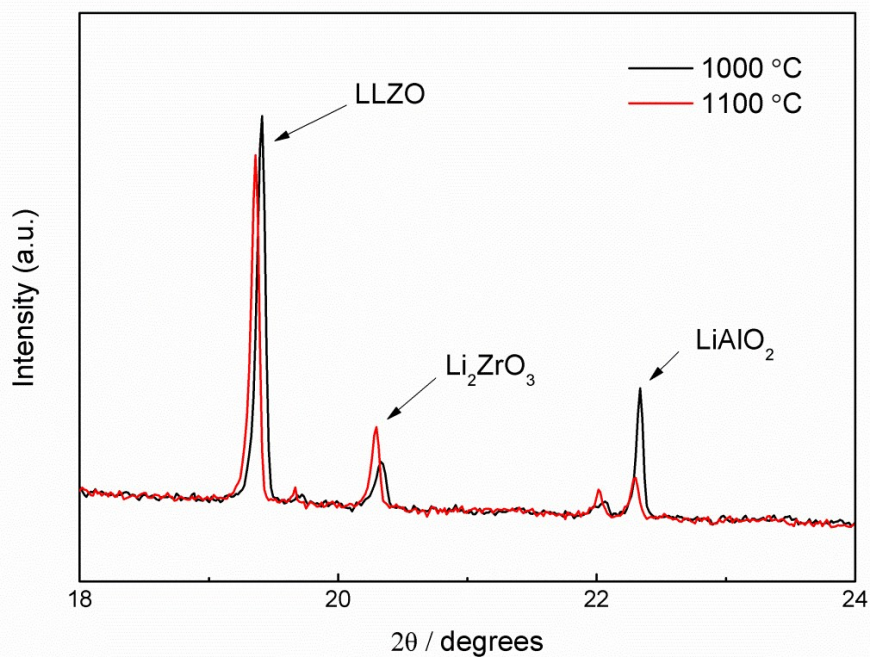

**Figure S4.** XRD patterns ( $2\theta$  from 18 to 24°) of LLZO (2 wt% Al) calcined at 1000 and 1100 °C.

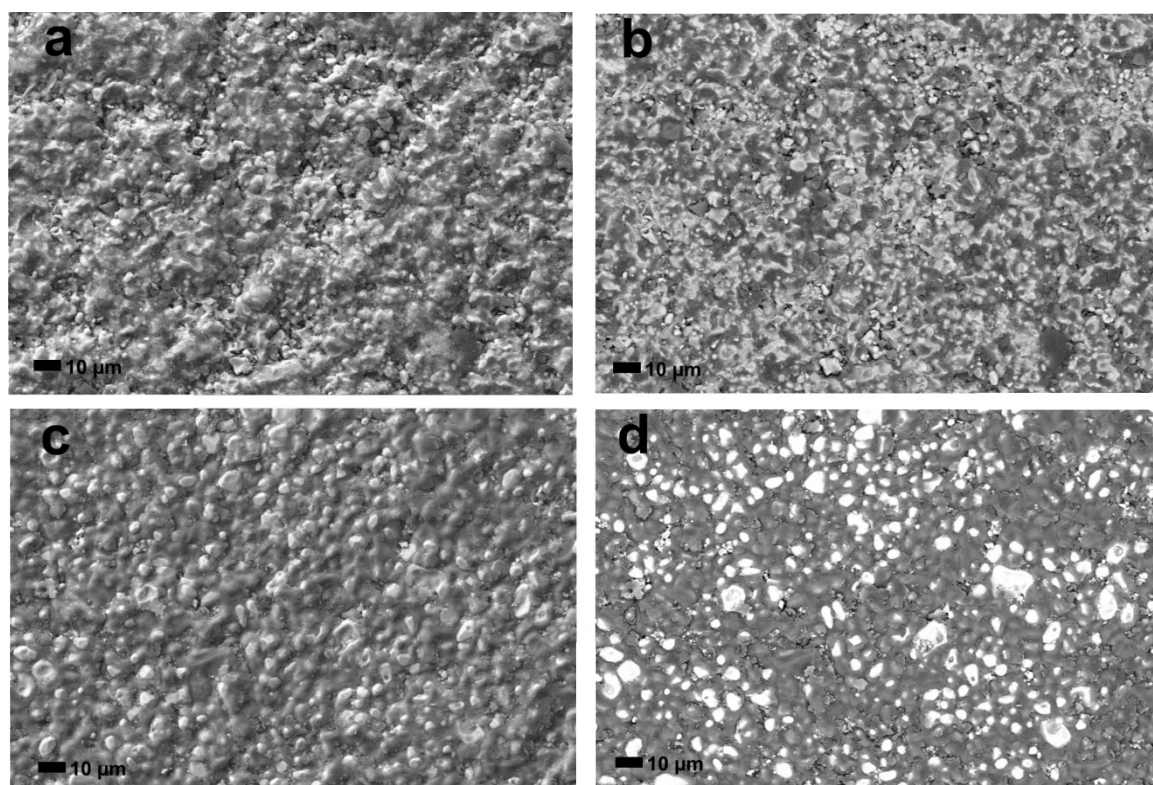

**Figure S5.** SEM images of the surface of the pellets calcined at 1000 °C (a,b), and 1100 °C (c,d). The images b and d were collected using an AsB detector.

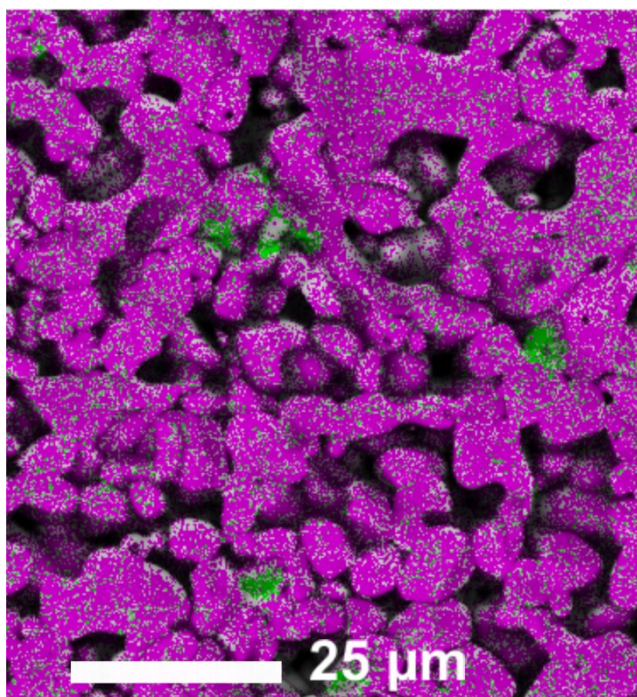

**Figure S6.** EDS elemental map of the bulk of the pellet showing La (red) and Zr (green) distribution. The La-free particles (fully green) are  $\text{Li}_2\text{ZrO}_3$  particles.

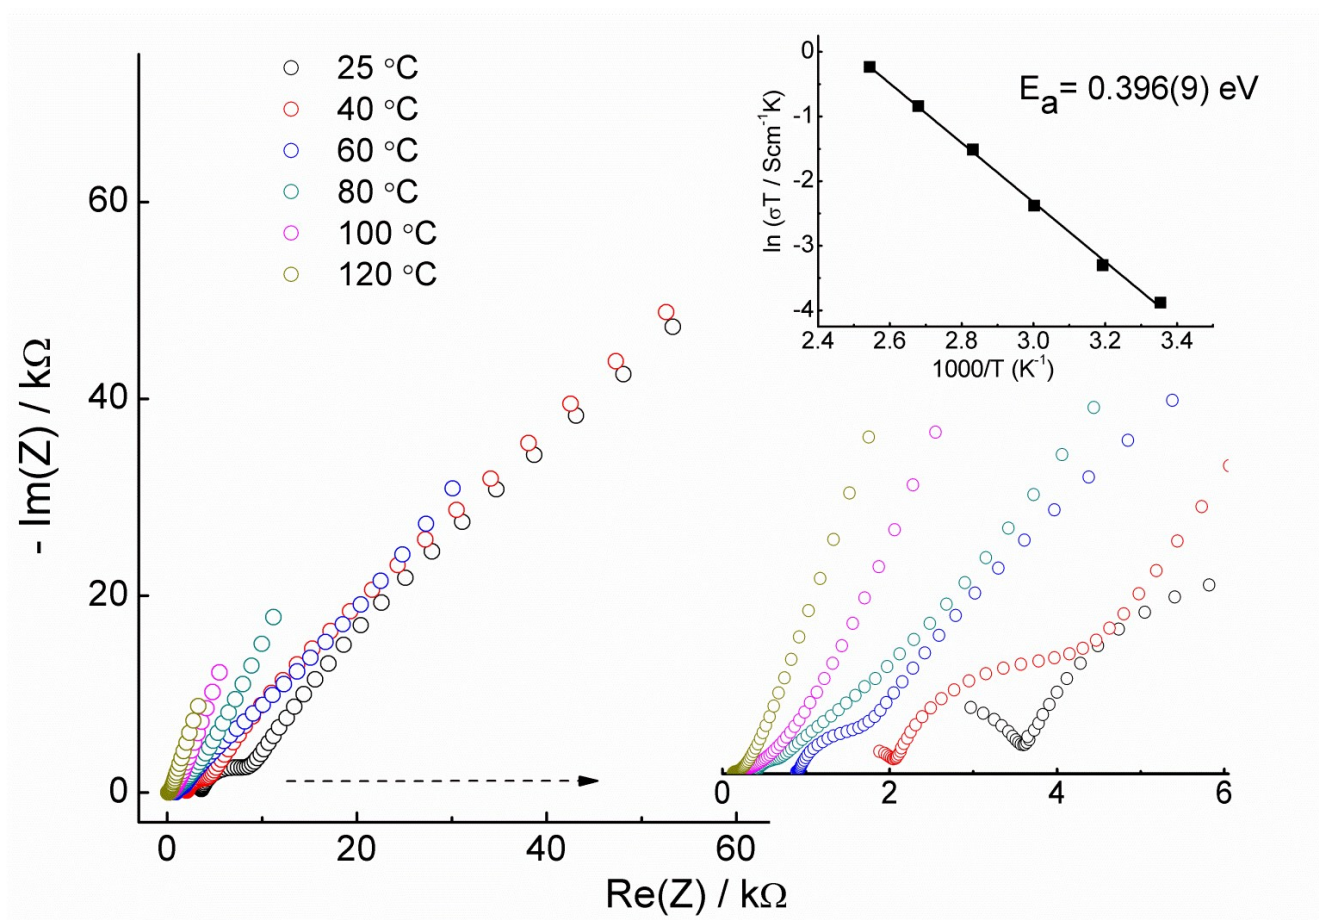

**Figure S7.** Impedance spectra and Arrhenius plot for the total conductivity of LLZO (2 wt% Al) calcined at 1000 °C in the temperature range 25-120 °C.

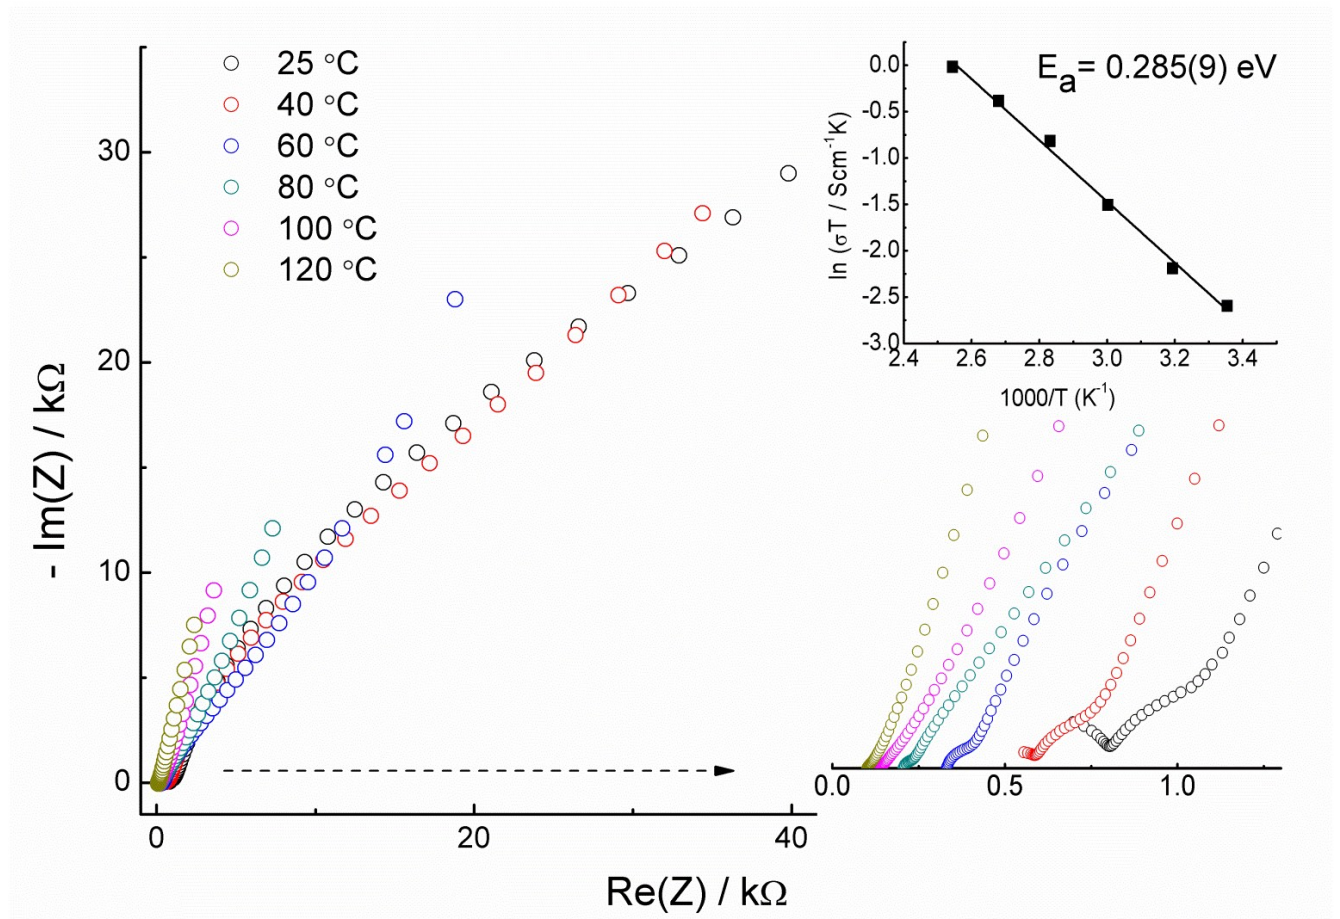

**Figure S8.** Impedance spectra and Arrhenius plot for the total conductivity of LLZO (2 wt% Al) calcined at 1100 °C (polished pellet) in the temperature range 25-120 °C.

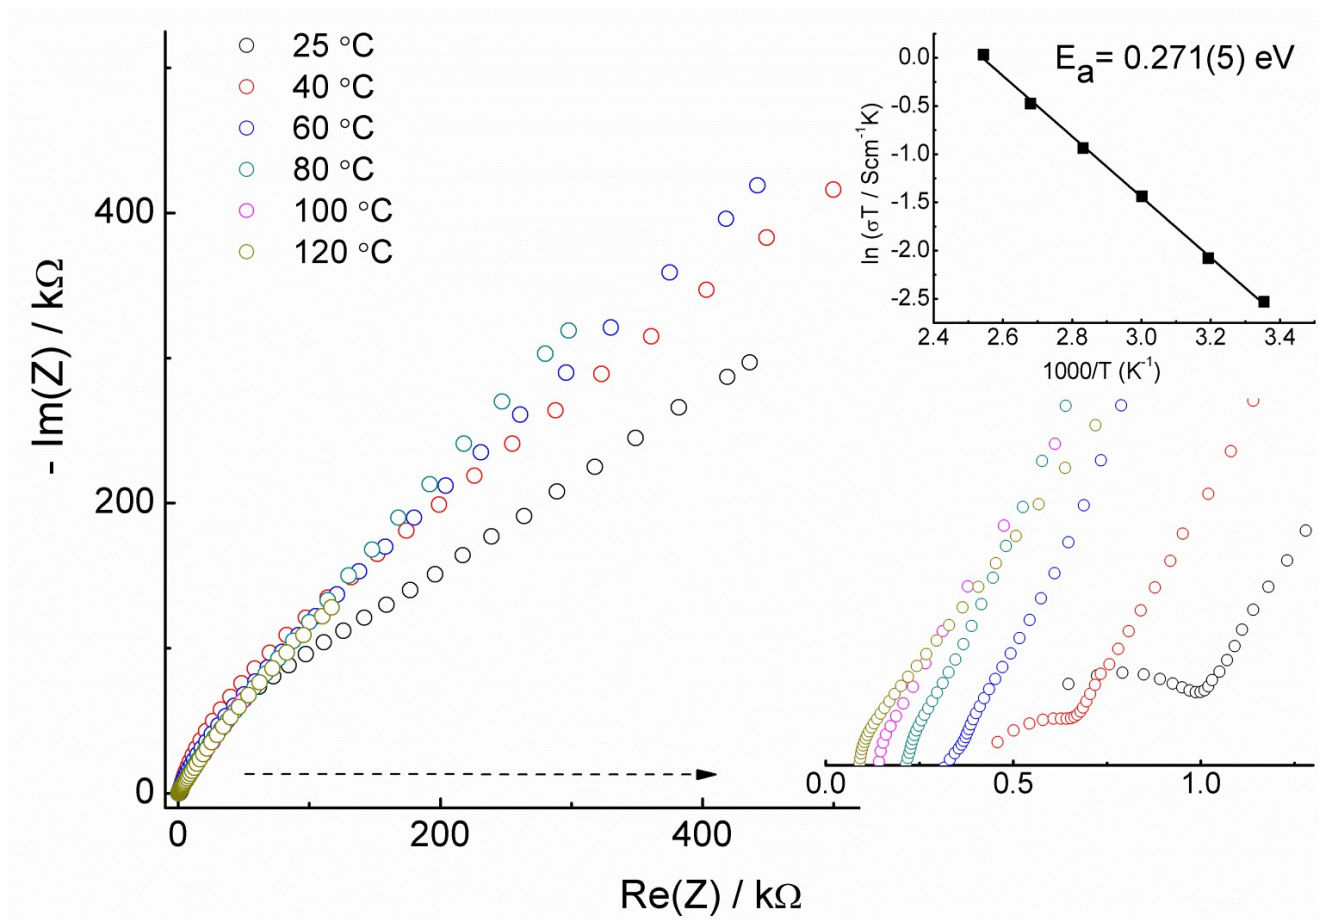

**Figure S9.** Impedance spectra and Arrhenius plot for the total conductivity of LLZO (2 wt% Al) calcined at 1100 °C (unpolished pellet) in the temperature range 25-120 °C.

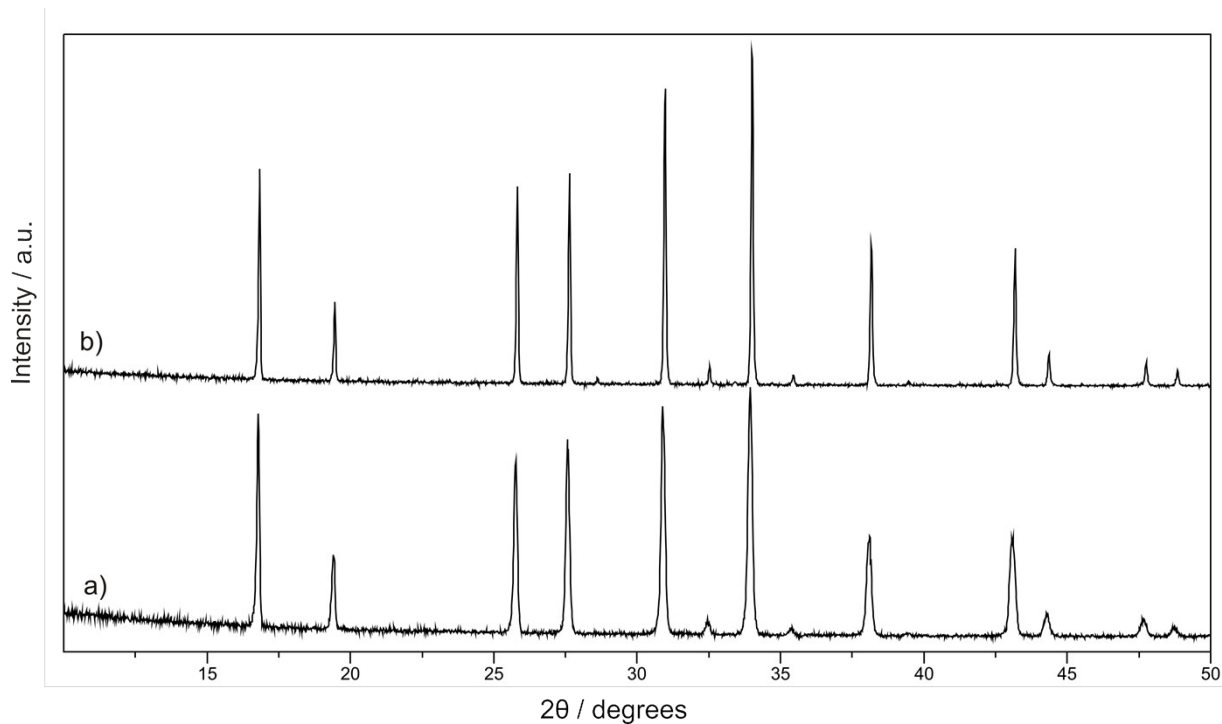

**Figure S10.** a) XRD pattern of  $\text{Li}_{6.4}\text{La}_3\text{Zr}_{1.4}\text{Ta}_{0.6}\text{O}_{12}$  prepared by sol-gel method and calcined at  $1000\text{ }^\circ\text{C}$  for 2h. b) XRD pattern of  $\text{Li}_{6.4}\text{La}_3\text{Zr}_{1.4}\text{Ta}_{0.6}\text{O}_{12}$  mixed with 1 wt% Al and calcined at  $1000\text{ }^\circ\text{C}$  for 2h.

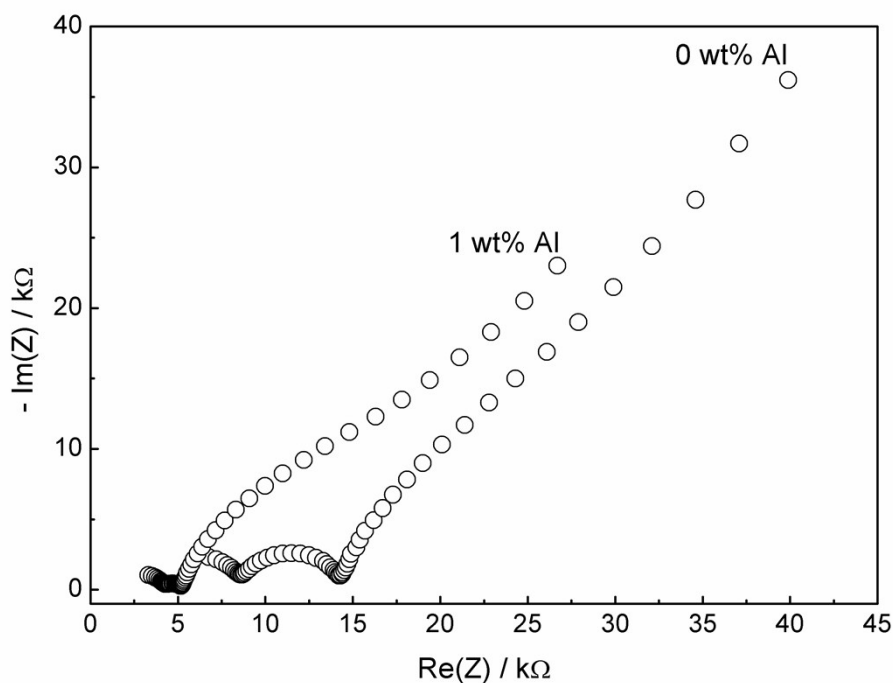

**Figure S11.** Impedance spectra for  $\text{Li}_{6.4}\text{La}_3\text{Zr}_{1.4}\text{Ta}_{0.6}\text{O}_{12}$  densified at  $1000\text{ }^\circ\text{C}$  in absence and in the presence of Al additives. The spectra were collected at room temperature using gold electrodes ( $1\text{-}10^6$  Hz frequency range), and show the improvement of the ionic conductivity after mixing with  $\text{Al}_2\text{O}_3$  nanosheets.
